# Supplementary material for: Identification of a novel Parkinson’s disease locus via stratified genome-wide association study
Source: PubMed Central journal article supplement (PMC3925254; doi:10.1186/1471-2164-15-118), 2014-02-10
Supplement: 1471-2164-15-118-S1.pdf [file 1471-2164-15-118-S1.pdf]

**Supplementary Table 1.** NGRC Subject characteristics.

|                                            | <b>Sporadic-PD</b> | <b>Familial-PD</b> | <b>Controls</b>   |
|--------------------------------------------|--------------------|--------------------|-------------------|
| N subjects                                 | 1565               | 435                | 1986              |
| Age at onset (mean $\pm$ s.d.)             | 58.83 $\pm$ 11.79  | 56.56 $\pm$ 12.30  | -                 |
| Age at blood draw (mean $\pm$ s.d.)        | 67.59 $\pm$ 10.68  | 66.06 $\pm$ 10.57  | 70.32 $\pm$ 14.09 |
| Male : Female                              | 1063 : 502         | 283 : 152          | 769 : 1217        |
| Cigarette smoking (odds ratio $\pm$ s.e.)  | 0.84 $\pm$ 0.07    | 0.74 $\pm$ 0.09    | Ref               |
| Caffeinated coffee (odds ratio $\pm$ s.e.) | 0.66 $\pm$ 0.06    | 0.65 $\pm$ 0.09    | Ref               |
| Ashkenazi Jewish                           | 4.22%              | 5.29%              | 2.01%             |

Smoking: ever vs. never smoked >100 cigarettes in lifetime.

Coffee: Heavy vs. light. Number of cups of caffeinated coffee drank per day multiplied by the number of years of consumption; heavy and light divided at the median in controls.

Jewish/Non-Jewish: Defined by self report superimposed on principal component analysis. The core of the Jewish cluster was defined within  $0.04 \leq PC1 \leq 0.055$  and  $0.001 \leq PC2 \leq 0.013$ .

Odds ratios (OR) were calculated for sporadic PD vs. all controls and Familial PD vs. all controls.

Smoking and coffee odds ratios include age at blood draw and sex as covariates.
