# Supplementary material for: Identification of a novel Parkinson’s disease locus via stratified genome-wide association study
Source: PubMed Central journal article supplement (PMC3925254; doi:10.1186/1471-2164-15-118), 2014-02-10
Supplement: 1471-2164-15-118-S2.pdf [file 1471-2164-15-118-S2.pdf]

**Supplementary Table 2.** Association of rs2338971 (chromosome 1p21) with Sporadic-PD was consistent across disease- and study-related strata.

|                                      | N    |         | MAF  |         | OR   | SE (OR) | P                     | P <sub>Het</sub> |
|--------------------------------------|------|---------|------|---------|------|---------|-----------------------|------------------|
|                                      | case | control | case | control |      |         |                       |                  |
| All subjects                         | 1565 | 1986    | 0.18 | 0.23    | 0.71 | 0.04    | 3.72x10 <sup>-8</sup> |                  |
| <b>PD-associated risk factors</b>    |      |         |      |         |      |         |                       |                  |
| Male                                 | 1063 | 769     | 0.19 | 0.24    | 0.74 | 0.06    | 2.53x10 <sup>-4</sup> | 0.36             |
| Female                               | 502  | 1217    | 0.16 | 0.23    | 0.66 | 0.07    | 2.44x10 <sup>-5</sup> |                  |
| Early onset (≤ 50 yrs)               | 381  | 1986    | 0.18 | 0.23    | 0.65 | 0.07    | 1.62x10 <sup>-4</sup> | NC               |
| Late onset (> 50 yrs)                | 1183 | 1986    | 0.18 | 0.23    | 0.72 | 0.05    | 1.70x10 <sup>-6</sup> |                  |
| Smokers                              | 581  | 696     | 0.17 | 0.24    | 0.68 | 0.07    | 1.98x10 <sup>-4</sup> | 0.66             |
| Non-smokers                          | 673  | 810     | 0.18 | 0.23    | 0.72 | 0.07    | 1.03x10 <sup>-3</sup> |                  |
| Coffee-heavy                         | 405  | 387     | 0.18 | 0.24    | 0.69 | 0.09    | 4.03x10 <sup>-3</sup> | 0.74             |
| Coffee-light                         | 739  | 544     | 0.17 | 0.23    | 0.65 | 0.07    | 4.12x10 <sup>-5</sup> |                  |
| OTC NSAIDs - ever                    | 758  | 657     | 0.16 | 0.23    | 0.64 | 0.06    | 7.22x10 <sup>-6</sup> | 0.58             |
| OTC NSAIDs - never                   | 479  | 326     | 0.20 | 0.26    | 0.69 | 0.09    | 3.37x10 <sup>-3</sup> |                  |
| <b>Recruitment site</b>              |      |         |      |         |      |         |                       |                  |
| New York                             | 351  | 300     | 0.17 | 0.22    | 0.71 | 0.10    | 0.02                  | 0.99             |
| Oregon                               | 342  | 898     | 0.19 | 0.23    | 0.74 | 0.09    | 0.01                  |                  |
| Georgia                              | 182  | 113     | 0.17 | 0.22    | 0.74 | 0.15    | 0.15                  |                  |
| Washington                           | 690  | 675     | 0.18 | 0.24    | 0.67 | 0.07    | 9.16x10 <sup>-5</sup> |                  |
| <b>PD-associated genes</b>           |      |         |      |         |      |         |                       |                  |
| rs356220 ( <i>SNCA</i> ) - CC        | 493  | 813     | 0.19 | 0.24    | 0.73 | 0.08    | 2.84x10 <sup>-3</sup> | 0.93             |
| rs356220 ( <i>SNCA</i> ) - CT        | 770  | 901     | 0.17 | 0.23    | 0.68 | 0.06    | 3.10x10 <sup>-5</sup> |                  |
| rs356220 ( <i>SNCA</i> ) - TT        | 302  | 272     | 0.19 | 0.24    | 0.74 | 0.12    | 0.06                  |                  |
| rs3129882 ( <i>HLA</i> ) - AA        | 434  | 726     | 0.17 | 0.23    | 0.67 | 0.08    | 4.90x10 <sup>-4</sup> | 0.92             |
| rs3129882 ( <i>HLA</i> ) - AG        | 790  | 948     | 0.19 | 0.24    | 0.73 | 0.06    | 3.04x10 <sup>-4</sup> |                  |
| rs3129882 ( <i>HLA</i> ) - GG        | 341  | 310     | 0.17 | 0.22    | 0.70 | 0.10    | 0.02                  |                  |
| rs1378358 ( <i>MAPT</i> ) - CC       | 1059 | 1198    | 0.18 | 0.24    | 0.67 | 0.05    | 4.58x10 <sup>-7</sup> | 0.82             |
| rs1378358 ( <i>MAPT</i> ) - CT       | 434  | 692     | 0.18 | 0.22    | 0.75 | 0.09    | 0.01                  |                  |
| rs1378358 ( <i>MAPT</i> ) - TT       | 44   | 76      | 0.17 | 0.24    | 0.60 | 0.22    | 0.17                  |                  |
| <b>Ashkenazi Jewish</b>              |      |         |      |         |      |         |                       |                  |
| Yes                                  | 66   | 40      | 0.14 | 0.19    | 0.85 | 0.34    | 0.68                  | 0.64             |
| No                                   | 1499 | 1946    | 0.18 | 0.23    | 0.71 | 0.05    | 5.02x10 <sup>-8</sup> |                  |
| <b>Paternal or Maternal Ancestry</b> |      |         |      |         |      |         |                       |                  |
| Great Britain                        | 416  | 356     | 0.18 | 0.21    | 0.72 | 0.10    | 0.02                  | 0.90             |
| Germany / Austria                    | 351  | 269     | 0.20 | 0.23    | 0.73 | 0.11    | 0.04                  |                  |
| Ireland                              | 197  | 162     | 0.15 | 0.23    | 0.64 | 0.14    | 0.04                  |                  |
| Scandinavia                          | 175  | 146     | 0.16 | 0.24    | 0.54 | 0.12    | 4.69x10 <sup>-3</sup> |                  |
| Eastern Europe                       | 72   | 78      | 0.22 | 0.25    | 0.94 | 0.26    | 0.83                  |                  |
| Italy                                | 71   | 68      | 0.13 | 0.24    | 0.45 | 0.17    | 0.04                  |                  |
| France                               | 65   | 68      | 0.18 | 0.24    | 0.57 | 0.18    | 0.08                  |                  |
| Russia                               | 49   | 23      | 0.17 | 0.30    | 0.54 | 0.25    | 0.19                  |                  |

Analyses were adjusted for PC1, PC2, sex and age. OR=odds ratio. SE=standard error of OR. P=statistical significance of association. P<sub>Het</sub>=statistical significance of heterogeneity within each strata (NC=not calculated because the two strata shared the same controls). **Smoker**: >100 cigarettes in lifetime. **Coffee**: Number of cups of caffeinated coffee drank per day multiplied by the number of years of consumption; high and low divided at the median in controls. **OTC NSAIDs**: Ever or never use of over the counter NSAIDs. **Jewish/Non-Jewish**: Defined by self report superimposed on principal component analysis. The core of the Jewish cluster was defined within 0.04≤PC1≤0.055 and 0.001≤PC2≤0.013. **Recruitment site**: US states where subjects were recruited from. **Paternal or maternal ancestry**: Self reports of the countries from which ancestors immigrated to US.
